# Supplementary material for: The Dynamic Change in Aromatic Compounds and Their Relationship with CsAAAT Genes during the Post-Harvest Process of Oolong Tea
Source: MDPI journal article supplement (doi:10.3390/metabo13070868), 2023-07-20
Supplement: s1 [file s1]

**Table S3 The Nucleic acid sequence of 16 candidate *CsAAAT* genes**

| Transcript       | Number           | Nucleic acid sequence(5'-3')                                                                                                                                                                                                                                                                                                                                                                                                                                                                                                                                                                                                                                                                                                                                                                                                                                                                                                                                                                                                                                                                                                                                                                                                                                                                                                                                                                                                                                                                                                                                                                                                                                                                                                                                                                                                                                                                                                                                             |
|------------------|------------------|--------------------------------------------------------------------------------------------------------------------------------------------------------------------------------------------------------------------------------------------------------------------------------------------------------------------------------------------------------------------------------------------------------------------------------------------------------------------------------------------------------------------------------------------------------------------------------------------------------------------------------------------------------------------------------------------------------------------------------------------------------------------------------------------------------------------------------------------------------------------------------------------------------------------------------------------------------------------------------------------------------------------------------------------------------------------------------------------------------------------------------------------------------------------------------------------------------------------------------------------------------------------------------------------------------------------------------------------------------------------------------------------------------------------------------------------------------------------------------------------------------------------------------------------------------------------------------------------------------------------------------------------------------------------------------------------------------------------------------------------------------------------------------------------------------------------------------------------------------------------------------------------------------------------------------------------------------------------------|
| Unigene22082_All | <i>CsAAAT1-1</i> | ATGTTGTTGGAGAAAAGAATTTGTTGTTAGCTTTAAGGATCATCATCATATTG<br>CTAATTAGGAAGCTCAATTTTGGGACTCTTGGTCTTCTCAATTTTGCAGAC<br>CATACCATACCAGAGGTACACGGAACAGTGAGATACAGAGACAGAGATTGG<br>AATTTGGAGCCAAGATTTTGAATAATGGAAGTAGCCAACAATTGGAAACGCC<br>GACGAAACATCACAATCAAAGGCATTCTGGGTCTGTTGATGGCCAACATCGATT<br>CCAACGACGAGAGGCGAATTATTCTCTGGGTATGGGAGACCCATCTGCCTAC<br>TCTTGCTTCCACCACTGTTGTTGCTGAAGAAGCTGTGGTCGATTCTCTTCG<br>CTCTGAGAAGTTCAATGGCTACTCTCCACAGTCGGTCTTCTCAAACCAGAA<br>CTGCAATTGCCGAATATTGTGACGTGATCTCCCTTACAAGTTATCACCCGACG<br>ATGCTTTTGTACATCTGGTTGCACTCAAGCTATTGATGTAGCATTGTCAATGT<br>TAGCTCGCCCGGGAGTGAATATTTGCTTCCAAGGCCAGGGTTCCTCAATCTAC<br>GAACTTTGTGCTGCTTTTAGACATCTTGAAGTTCGGCATTTTGAATCTTCTCC<br>GAAAAGGGTTGGGAAGTTGATCTTGATGCTGTGCAAGCTCTTGACAGCCATA<br>AACTGCTGCAATGTAATCATAAATCCTGGGAATCCATGTGGCAACGTCTATA<br>CTTATCAACATTTGAAGAAGATTGCTGAAACTGCTAAAAGGCTGAAAATTCTT<br>GTAATTGCTGATGAAGTTTATGGCCACCTTGCTTTTGGGGCTAATCCTTTTGTG<br>CCGATGGGAGTTTTTGGTTCAGTTGTTCAGTTCTCACGCTTGGCTCTTTATCA<br>AAGCGATGGATAGTCCCGGTTGGCGACTTGGTTGGTTTGTGATAAATGATCC<br>AAATGACATCTTCAGAAACCCAAAGATTGTTGAGCGGCTTAAGAAGTATTTTG<br>ATATTCTTGGGGTCTTCGACATTATACAGGCAGCAGTCCCGCGCATTCTTC<br>AGCAAATGAAGCGTATTCTTTACAAAGACCATTAAATATACTAAAGCAGACC<br>TCTGATATTTGTTGTGAAAGAATAAAGGAGATTCTTGCAATTCATGCCATAT<br>AAACCAGTGGGATCCATGGCTGTTATGATGAACTGAATGTTCCCTCTCAA<br>AGACATTAGCGATGACATTGACTTTTGCTTCAAAGTGGCCAAGGAGGAATCTG<br>TGATCATTCTTCCAGGACTTGCTGTGGGTATGAAAGATTGGATTGCGATCACTT<br>TCGCGGTTGAACCATCTTCACTTGAAGAAGCTTTCGGGAGGGTGAAGTCTTT<br>CTATCACCGACACTCCAATCAGCAAATAGAATACTAA<br>ATGGAAAATGGAGGGAAGAAATTGAATAATGGAAGTAGCCAACAATTCGAAA<br>CGCCGACGAACATCACAATCAAAGGCATTCTGGGTCTGTTGATGGCCAACATC<br>GATTCCAACGACGAGAGGCGAATTATTTCTCTGGGTATGGGAGACCCATCTGC<br>TACTCTTGCTTCCACACCACTGTTGTTGCTGAAGAAGCTGTGGTCGATTCTC<br>TTCGCTCTGAGAAGTTCAATGGCTACTCTCCACAGTCGGTCTTCTCAAACC<br>AGAACTGCAATTGCCGAATATTGTGACGTGATCTCCCTTACAAGTTATCACCC<br>GACGATGCTTTTGTACATCTGGTTGCACTCAAGCTATTGATGTAGCATTGTCA |
|                  |                  | ATGTTAGCTCGCCCGGGAGTGAATATTTGCTTCCAAGGCCAGGGTTCCTCAAT<br>CTACGAACTTTGTGCTGCTTTTAGACATCTTGAAGTTCGGCATTTTGAATCTTCT<br>TCCCGAAAAGGGTTGGGAAGTTGATCTTGATGCTGTGCAAGCTCTTGACAGAC<br>CATAACACTGCTGCAATGGTAATCATAAATCCTGGGAATCCATGTGGCAATGTC<br>TATACTTATCAACATTTGAAGAAGATTGCTGAAACTGCTAAAAGGCTGAAAAT<br>TCCTGTAATTGCTGATGAAGTTTATGGCCACCTTGCTTTTGGGGCTAATCCTTT<br>TGTGCCGATGGGAGTTTTTGGTTCAGTTGTTCCAGTTCTCACGCTTGGCTCTTT<br>ATCAAAGCGATGGATAGTCCCGGTTGGCGACTTGGTTGGTTTGTGATAAATG                                                                                                                                                                                                                                                                                                                                                                                                                                                                                                                                                                                                                                                                                                                                                                                                                                                                                                                                                                                                                                                                                                                                                                                                                                                                                                                                                                                                                                                                                                 |
| Unigene17062_All | <i>CsAAAT1-2</i> |                                                                                                                                                                                                                                                                                                                                                                                                                                                                                                                                                                                                                                                                                                                                                                                                                                                                                                                                                                                                                                                                                                                                                                                                                                                                                                                                                                                                                                                                                                                                                                                                                                                                                                                                                                                                                                                                                                                                                                          |

|                  |           |                                                                                                                                                                                                                                                                                                                                                                                                                                                                                                                                                                                                                                                                                                                                                                                                                                                                                                                                                                                                                                                                                                                                                                                                                                                                                                                                                                                                                                                                                                                                                                                                                                                                                                                                                                                                                                                                                                                                                                                                                                                                                                                                                                                                                                                                                                                                                                                                                                                                                                                                                                                                                    |
|------------------|-----------|--------------------------------------------------------------------------------------------------------------------------------------------------------------------------------------------------------------------------------------------------------------------------------------------------------------------------------------------------------------------------------------------------------------------------------------------------------------------------------------------------------------------------------------------------------------------------------------------------------------------------------------------------------------------------------------------------------------------------------------------------------------------------------------------------------------------------------------------------------------------------------------------------------------------------------------------------------------------------------------------------------------------------------------------------------------------------------------------------------------------------------------------------------------------------------------------------------------------------------------------------------------------------------------------------------------------------------------------------------------------------------------------------------------------------------------------------------------------------------------------------------------------------------------------------------------------------------------------------------------------------------------------------------------------------------------------------------------------------------------------------------------------------------------------------------------------------------------------------------------------------------------------------------------------------------------------------------------------------------------------------------------------------------------------------------------------------------------------------------------------------------------------------------------------------------------------------------------------------------------------------------------------------------------------------------------------------------------------------------------------------------------------------------------------------------------------------------------------------------------------------------------------------------------------------------------------------------------------------------------------|
|                  |           | <p>ATCCAAATGACATCTTCAGAAACCCAAAGATTGTTGAGCGGCTTAAGAAGTAT<br/>TTTGATATTCTTGGGGGTCCTTCGACATTATACAGGCAGCAGTCCCGCGCATT<br/>CTTCAGCAAACTGAAGACGTATTCTTTACAAAGACCATTAATATACTAAAGCA<br/>GACCTCTGATATTGTTGTGAAAGAATAAAGGAGATTCTTGCAATTCATGCC<br/>ATATAAACCAAGTGGGATCCATGGCTGTTATGATGAACTGAATGTTCCCTCCT<br/>CAAAGACATTAGCGATGACATTGACTTTTGCTTCAAAGTGGCCAAGGAGGAAT<br/>CTGTGATCATTCTCCAGGACTTGCTGTGGGTATGAAAGATTGGATTTCGCATCA<br/>CTTCGCGGTTGAACCATCTCACTGAAGAAGCTTTCGGGAGGGTGAAGTC<br/>TTTCTATCACCGACACTCCAATCAGCAAATAGAATACTAA<br/>ATGTTGTTGGAGAAAAGAATTTGTTGTTAGCTTTAAGGATCATCATCATATTG<br/>CTAATTAGGAAGCTCAATTTTGGGACTCTTGGTCTTCTCAATTTTGCAGAC<br/>CATACCATACCAGAGCTACACGGAACAGTGAGATACAGAGACAGAGAAATGG<br/>AAAATGGAGGGAAGAAATTGAATAATGGAAGTAGCCAACAATTCGAAACGCC<br/>GACGAACATCACAATCAAAGGCATTCTGGGTGTTGATGGCCAACATCGATT<br/>CCAACGACGAGAGGCGAATTATAACTCTGCCTATGCCAGACGGATCTGCCTAC<br/>TCTTGCTTCCAGACCACTGTTGCTGAAGAAAGCTGTGGTTCGATTCTCTTCG<br/>CTCTGAGAAGTTCAATGGCTACTCTCCACAGTCGGTCTTCTCAAACCAGAA<br/>CGCAATTGCCGAATATTGTCACGTGATCTCCCTTACAAGTTATCACCCGACG<br/>ATGCTTTTGTACATCTGGTTGCACTCAAGCTATTGATGTAGCATTGTCAATGT<br/>TAGCTCGCCCGGGAGTGAATATTTGCTTCCAAGGCCAGGGTTCCTCAATCTAC<br/>GAACTTTGTGCTGCTTTTAGACATCTTGAAGTTCGGCATTTTGATCTTCTTCCC<br/>GAAAAGGGTTGGGAAGTTGATCTTGATGCTGTGCAAGCTCTTGACAGCCATA<br/>ACACTGCTGCAATGTAATCATAAATCCTGGGAATCCATGTGGCAATGTCTATA<br/>CTTATCAACATTTGAAGAAGATTGCTGAAACTGCTAAAAGGCTGAAAATTCCT<br/>GTAATTGCTGATGAAGTTTATGGCCACCTTGCTTTTGGGGCTAATCCTTTTGTG<br/>CCGATGGGAGTTTTTGGTTCAAGTTGTTCCAGTTCTCACGCTTGGCTCTTTATCA<br/>AAGCGATGGATAGTCCCGGTTGGCGACTTGCTTGGTTTGTGATAAATGATCC<br/>AAATGACATCTTCAGAAACCCAAAGATTGTTGAGCGGCTTAAGAAGTATTTG<br/>ATATTCTTGGGGGTCCTTCGACATTATACAGGCAGCAGTCCCGCGCATTCTTC<br/>AGCAAACTGAAGGCGTATTCTTTACAAAGACCATTAATATACTAAAGCAGACC<br/>TCTGATATTTGTTGTGAAAGAATAAAGGAGATTCTTGCAATTCATGCCATAT<br/>AAACCAGTGGGATCCATGGCTGTTATGATGAACTGAATGTTCCCTCCTCAA<br/>AGACATTAGCGATGACATTGACTTTTGCTTCAAAGTGGCCAAGGAGGAATCTG<br/>TGATCATTCTTCCAGGTGAGATACGAATCATCAATCGATCGCCTAATTAG<br/>ATGTTGTTGGAGAAAAGAATTTGTTGTTAGCTTTAAGGATCATCATCATATTG<br/>CTAATTAGGAAGCTCAATTTTGGGACTCTTGGTCTTCTCAATTTTGCAGAC<br/>CATACCATACCAGAGCTACACGGAACAGTGAGATACAGAGACAGAGAAATGG<br/>AAAATGGAGGGAAGAAATTGAATAATGGAAGTAGCCAACAATTCGAAACGCC<br/>GACGAACATCACAATCAAAGGCATTCTGGGTCTGTTGATGGCCAACATCGATT<br/>CCAACGACGAGAGGCGAATTATTCTCTGGGTATGGGAGACCCATCTGCCTAC<br/>TCTTGCTTCCACACCACTGTTGTTGCTGAAGAAGCTGTGGTTCGATTCTCTTCG<br/>CTCTGAGAAGTTCAATGGCTACTCTCCACAGTCGGTCTTCTCAAACCAGAA<br/>CGCAATTGCCGAATATTGTCACGTGATCTCCCTTACAAGTTATCACCCGACG<br/>ATGCTTTTGTACATCTGGTTGCACTCAAGCTATTGATGTAGCATTGTCAATGT</p> |
| Unigene13237_All | CsAAAT1-3 |                                                                                                                                                                                                                                                                                                                                                                                                                                                                                                                                                                                                                                                                                                                                                                                                                                                                                                                                                                                                                                                                                                                                                                                                                                                                                                                                                                                                                                                                                                                                                                                                                                                                                                                                                                                                                                                                                                                                                                                                                                                                                                                                                                                                                                                                                                                                                                                                                                                                                                                                                                                                                    |
| Unigene65900_All | CsAAAT1-4 |                                                                                                                                                                                                                                                                                                                                                                                                                                                                                                                                                                                                                                                                                                                                                                                                                                                                                                                                                                                                                                                                                                                                                                                                                                                                                                                                                                                                                                                                                                                                                                                                                                                                                                                                                                                                                                                                                                                                                                                                                                                                                                                                                                                                                                                                                                                                                                                                                                                                                                                                                                                                                    |

|                  |                                                                                                                                                                                                                                                                                                                                                                                                                                                                                                                                                                                                                                                                                                                                                                                                                                                                                                                                                                                                                                                                                                                                                                                                                                                                                                                                                                                                                                                                                                                                                                                                                                                                                                                                                                                                                                                                                                                                                                                                                                                                                                                                                                                                                                                                                                                                                                                                                                                                                                                                                                                                                                                                                                          |
|------------------|----------------------------------------------------------------------------------------------------------------------------------------------------------------------------------------------------------------------------------------------------------------------------------------------------------------------------------------------------------------------------------------------------------------------------------------------------------------------------------------------------------------------------------------------------------------------------------------------------------------------------------------------------------------------------------------------------------------------------------------------------------------------------------------------------------------------------------------------------------------------------------------------------------------------------------------------------------------------------------------------------------------------------------------------------------------------------------------------------------------------------------------------------------------------------------------------------------------------------------------------------------------------------------------------------------------------------------------------------------------------------------------------------------------------------------------------------------------------------------------------------------------------------------------------------------------------------------------------------------------------------------------------------------------------------------------------------------------------------------------------------------------------------------------------------------------------------------------------------------------------------------------------------------------------------------------------------------------------------------------------------------------------------------------------------------------------------------------------------------------------------------------------------------------------------------------------------------------------------------------------------------------------------------------------------------------------------------------------------------------------------------------------------------------------------------------------------------------------------------------------------------------------------------------------------------------------------------------------------------------------------------------------------------------------------------------------------------|
| Unigene71295_All | <p><i>CsAAAT1-5</i></p> <p>TAGCTCGCCCGGAGTGAATATTTGCTTCCAAGGCCAGGGTTCCCAATCTAC<br/> GAACTTTGTGCTGCTTTTAGACATCTTGAAGTTCGGCATTTTGATCTTCTCCC<br/> GAAAAGGGTTGGGAAGTTGATCTTGATGCTGTGCAAGCTCTTGCGAGACCATA<br/> ACACTGCTGCAATGGTAATCATAAATCCTGGGAATCCATGTGGCAATGTCTATA<br/> CTTATCAACATTTGAAGAAGATTGCTGAAACTGCTAAAAGGCTGAAAATCTCT<br/> GTAATTGCTGATGAAGTTTATGGCCACCTTGCTTTTGGGGCTAATCCTTTTGTG<br/> CCGATGGGAGTTTTTGGTTCAGTTGTTCCAGTTCTCACGCTTGGCTCTTTATCA<br/> AAGCGATGGATAGTCCCCGGTTGGCGACTTGTTGGTTTGTGATAAATGATCC<br/> AAATGACATCTTCAGAAACCCAAAGATTGTTGAGCGGCTTAAGAAGTATTTTG<br/> ATATTCTTGGGGTCTTCGACATTATACAGAATTCTGAGGAATAA<br/> ATGGAAAATGGAGGGAAGAAATTGAATAATGGAAGTAGCCAACAATTCGAAA<br/> CGCCGACGAACATCACAATCAAAGGCATTCTGGGTCTGTTGATGGCCAACATC<br/> GATTCCAACGACGAGAGGCGAATGATTTCTCTGGGTATGGGAGACCCATCTGC<br/> CTACTCTTGCTTCCACACCACTGTTGTGCTGAAGAAGCTGTGGTCGATTCTC<br/> TTCGCTCTGAGAAGTTCAATGGCTACTCTCCACAGTCGGTCTTCCTCAAACC<br/> AGAACTGCAATTGCCGAATATTTGTACGTGATCTCCCTTACAAGTTATCACCC<br/> GACGATGCTTTTGTACATCTGGTTGCACTCAAGCTATTGATGTAGCATTGTCA<br/> ATGTTAGCTCGCCCGGAGTGAATATTTGCTTCCAAGGCCAGGGTTCCCAAT<br/> CTACGAACTTTGTGCTGCTTTTAGACATCTTGAAGTTCGGCATTTTGATCTTCT<br/> TCCCGAAAAGGGTTGGGAAGTTGATCTTGATGCTGTGCAAGCTCTTGCGAGAC<br/> CATAACACTGCTGCAATGGTAATCATAAATCCTGGGAATCCATGTGGCAATGTC<br/> TATACTTATCAACATTTGAAGAAGATTGCTGAAACTGCTAAAAGGCTGAAAAT<br/> TCCTGTAATTGCTGATGAAGTTTATGGCCACCTTGCTTTTGGGGCTAATCCTTT<br/> TGTGCCGATGGGAGTTTTTGGTTCAGTTGTTCCAGTTCTCACGCTTGGCTCTTT<br/> ATCAAAGCGATGGATAGTCCCCGGTTGGCGACTTGTTGGTTTGTGATAAATG<br/> ATCCAAATGACATCTTCAGAAACCCAAAGATTGTTGAGCGGCTTAAGAAGTAT<br/> TTTGATATTCTTGGGGTCTTCGACATTATACAGAATTCTGAGGAATAA<br/> ATGTTGTTGGAGAAAAGAATTGTTGTTAGCTTTAAGGATCATCATCATATTG<br/> CTAATTAGGAAGCTCAATTTTGGGACTCTTTGGTCTTCTCAATTTTTCAGAC<br/> CATACCATAACCAGAGCTACACGGAACAGTGAGATACAGAGACAGAGAAATGG<br/> AAAATGGAGGGAAGAAATTGAATAATGGAAGTAGCCAACAATTCGAAACGCC<br/> GACGAACATCACAATCAAAGGCATTCTGGGTCTGTTGATGGCCAACATCGATT<br/> CCAACGACGAGAGGCGAATTATTCTCTGGGTATGGGAGACCCATCTGCCTAC<br/> TCTTGCTTCCACACCACTGTTGTTGCTGAAGAAGCTGTGGTCGATTCTCTTCG<br/> CTCTGAGAAGTTCAATGGCTACTCTCCACAGTCGGTCTTCCTCAAACCAGAA<br/> CGGCAATTGCCGAATATTTGTACGTGATCTCCCTTACAAGTTATCACCCGACG<br/> ATGCTTTTGTACATCTGGTTGCACTCAAGCTATTGATGTAGCATTGTCAATGT<br/> TAGCTCGCCCGGAGTGAATATTTGCTTCCAAGGCCAGGGTTCCCAATCTAC<br/> GAACTTTGTGCTGCTTTTAGACATCTTGAAGTTCGGCATTTTGATCTTCTCCC<br/> GAAAAGGGTTGGGAAGTTGATCTTGATGCTGTGCAAGCTCTTGCGAGACCATA<br/> ACACTGCTGCAATGGTAATCATAAATCCTGGGAATCCATGTGGCAATGTCTATA<br/> CTTATCAACATTTGAAGAAGATTGCTGAAACTGCAAAAAGGCTGAAAATCTT<br/> GTAATTGCTGATGAAGTTTATGGCCACCTTGCTTTTGGGGCTAATCCTTTTGTG<br/> TCGATTGGAGTCTTTGGATCGGTTGTTCCAGTTCTCACGCTTGGGTCTTTATCA</p> |
| Unigene65894_All | <p><i>CsAAAT1-6</i></p> <p>CGGCAATTGCCGAATATTTGTACGTGATCTCCCTTACAAGTTATCACCCGACG<br/> ATGCTTTTGTACATCTGGTTGCACTCAAGCTATTGATGTAGCATTGTCAATGT<br/> TAGCTCGCCCGGAGTGAATATTTGCTTCCAAGGCCAGGGTTCCCAATCTAC<br/> GAACTTTGTGCTGCTTTTAGACATCTTGAAGTTCGGCATTTTGATCTTCTCCC<br/> GAAAAGGGTTGGGAAGTTGATCTTGATGCTGTGCAAGCTCTTGCGAGACCATA<br/> ACACTGCTGCAATGGTAATCATAAATCCTGGGAATCCATGTGGCAATGTCTATA<br/> CTTATCAACATTTGAAGAAGATTGCTGAAACTGCAAAAAGGCTGAAAATCTT<br/> GTAATTGCTGATGAAGTTTATGGCCACCTTGCTTTTGGGGCTAATCCTTTTGTG<br/> TCGATTGGAGTCTTTGGATCGGTTGTTCCAGTTCTCACGCTTGGGTCTTTATCA</p>                                                                                                                                                                                                                                                                                                                                                                                                                                                                                                                                                                                                                                                                                                                                                                                                                                                                                                                                                                                                                                                                                                                                                                                                                                                                                                                                                                                                                                                                                                                                                                                                                                                                                                                                                                                                                                                                                                                                                                                                                                                                                                                             |

|                  |                  |                                                                                                                                                                                                                                                                                                                                                                                                                                                                                                                                                                                                                                                                                                                                                                                                                                                                                                                                                                                                                                                                                                                                                                                                                                                                                                                                                                                                                                                                                                                                                                                                                                                                                                                                                                                                                                                                                                                                                                                                                                                                                                                                                                                                                                                                                                                                                                                                                                                                                                                                                                                                                   |
|------------------|------------------|-------------------------------------------------------------------------------------------------------------------------------------------------------------------------------------------------------------------------------------------------------------------------------------------------------------------------------------------------------------------------------------------------------------------------------------------------------------------------------------------------------------------------------------------------------------------------------------------------------------------------------------------------------------------------------------------------------------------------------------------------------------------------------------------------------------------------------------------------------------------------------------------------------------------------------------------------------------------------------------------------------------------------------------------------------------------------------------------------------------------------------------------------------------------------------------------------------------------------------------------------------------------------------------------------------------------------------------------------------------------------------------------------------------------------------------------------------------------------------------------------------------------------------------------------------------------------------------------------------------------------------------------------------------------------------------------------------------------------------------------------------------------------------------------------------------------------------------------------------------------------------------------------------------------------------------------------------------------------------------------------------------------------------------------------------------------------------------------------------------------------------------------------------------------------------------------------------------------------------------------------------------------------------------------------------------------------------------------------------------------------------------------------------------------------------------------------------------------------------------------------------------------------------------------------------------------------------------------------------------------|
| Unigene3903_All  | <i>CsAAAT1-7</i> | <p> AAGCGATGGATAGTCCCGGTTGGCGACTTGGTTGGTTTGTGATAAATGATCC<br/> AAATGACATCTTCAGAAACCCAAAGATTGTTGAGCGGCTTAAGAAGTATTTTG<br/> ATATTCTTGGGGTTCCTTCGACATTATACAGAATTCTGAGGAATAA<br/> ATGGAAAATGGAGGGAAGAAATTGAATAATGGAAGTAGCCAACAATTCGAAA<br/> CGCCGACGAACATCACAAATCAAAGGCATTCTGGGTCTGTTGATGGCCAACATC<br/> GATTCCAACGACGAGAGGCGAATTATTTCTCTGGGTATGGGAGACCCATCTGC<br/> CTACTCTTGCTTCCACACCACTGTTGTTGCTGAAGAAGCTGTGGTCGATTCTC<br/> TTCGCTCTGAGAAGTTCAATGGCTACTCTCCACAGTCGGTCTTCTCAAACC<br/> AGAACTGCAATTGCCGAATATTTGTACGTGATCTCCCTTACAAGTTATCACCC<br/> GACGATGCTTTTGTACATCTGGTTGCACTCAAGCTATTGATGTAGCATTGTCA<br/> ATGTTAGCTCGCCCGGAGTGAATATTTGCTTCCAAGGCCAGGGTTCCCAAT<br/> CTACGAACTTTGTGCTGCTTTTAGACATCTTGAAGTTCGGCATTGTGATCTTCT<br/> TCCCGAAAAGGGTTGGGAAGTTGATCTTGATGCTGTGCAAGCTCTTGACAGAC<br/> CATAACACTGCTGCAATGGTAATCATAAATCCTGGGAATCCATGTGGCAACGT<br/> CTATACTTATCAACATTTGAAGAAGATTGCTGAAACTGCTAAAAGGCTGAAAA<br/> TTCCTGTAATTGCTGATGAAGTTTATGGCCACCTTGCTTTTGGGGCTAATCCTT<br/> TTGTGCCGATGGGAGTTTTTGGTTCAGTTGTTCCAGTTCTCACGCTTGGCTCTT<br/> TATCAAAGCGATGGATAGTCCCGGTTGGCGACTTGGTTGGTTTGTGATAAAT<br/> GATCCAAGTGACTTCTTCAAAAACCCCAAGGTTTGCTTTGTGTACTTTCTCTT<br/> CTGGTAA<br/> TGTTGTTTAGCTTTAAGGATCATCATATTTGCTAATTAGGAAGCTCAATTTT<br/> GGGACTCTTTGGTCTTCTCAATTTTGCAGACCATAACCATAACCAGAGCTACAC<br/> GGAACAGTGAGATACAGAGACAGAGAAATGGAAAATGGAGGGAAGAAATTG<br/> AATAATGGAAGTAGCCAACAATTCGAAACGCCGACGAACATCACAAATCAAAG<br/> GCATTCTGGGTCTGTTGATGGCCAACATCGATTCCAACGACGAGAGGCGAATT<br/> ATTTCTCTGGGTATGGGAGACCCATCTGCCTACTCTTGCTTCCACACCACTGTT<br/> GTTGCTGAAGAAGCTGTGGTCGATTCTCTCGCTCTGAGAAGTTCAATGGCTA<br/> CTCTCCCACAGTCGGTCTTCTCAAACCAGAACTGCAATTGCCGAATATTTGT<br/> CACGTGATCTCCCTTACAAGTTATCACCCGACGATGCTTTTGTACATCTGGTT<br/> GCACTCAAGCTATTGATGTAGCATTGTCAATGTTAGCTCGCCCGGAGTGAATA<br/> TTTTGCTTCCAAGGCCAGGGTTCCCAATCTACGAACTTTGTGCTGCTTTTAGA<br/> CATCTTGAAGTTCGGCATTGTGATCTTCTTCCGAAAAGGGTTGGGAAGTTGA<br/> TCTTGATGCTGTGCAAGCTCTTGACAGACCATAACACTGTGCAATGGTAATCAT<br/> AAATCCTGGGAATCCATGTGGCAACGTCTATACTTATCAACATTTGAAGAAGAT<br/> TGCTGAAACTGCTAAAAGGCTGAAAATTCCTGTAATTGCTGATGAAGTTTATG<br/> GCCACCTTGCTTTTGGGGCTAATCCTTTTGTGCCGATGGGAGTTTTTGGTTCAG<br/> TTGTTCCAGTTCTCACGCTTGGCTCTTATCAAAGCGATGGATAGTCCCGGTT<br/> GGCGACTTGTTGGTTTGTGATAAATGATCCAAGTGACTTCTTCAAAAACCC<br/> AAGGTTTGCTTTGTGTACTTTCTCTTCTGGTAA<br/> ATGGGAGTTTTTGGTTCAGTTGTTCCAGTTCTCACGCTTGGCTCTTATCAAAG<br/> CGATGGATAGTCCCGGTTGGCGACTTGTTGGTTTGTGATAAATGATCCAAA<br/> TGACATCTTCAGAAACCCAAAGATTGTTGAGCGGCTTAAGAAGTATTTGATA<br/> TTCTTGGGGTTCCTTCGACATTATACAGGCAGCAGTCCCGCGCATTCTCAG<br/> CAAACCTGAAGACGTATTCTTTACAAAGACCATTAATACTAAAGCAGACCTC </p> |
| Unigene39034_All | <i>CsAAAT1-8</i> | <p> GCACTCAAGCTATTGATGTAGCATTGTCAATGTTAGCTCGCCCGGAGTGAATA<br/> TTTTGCTTCCAAGGCCAGGGTTCCCAATCTACGAACTTTGTGCTGCTTTTAGA<br/> CATCTTGAAGTTCGGCATTGTGATCTTCTTCCGAAAAGGGTTGGGAAGTTGA<br/> TCTTGATGCTGTGCAAGCTCTTGACAGACCATAACACTGTGCAATGGTAATCAT<br/> AAATCCTGGGAATCCATGTGGCAACGTCTATACTTATCAACATTTGAAGAAGAT<br/> TGCTGAAACTGCTAAAAGGCTGAAAATTCCTGTAATTGCTGATGAAGTTTATG<br/> GCCACCTTGCTTTTGGGGCTAATCCTTTTGTGCCGATGGGAGTTTTTGGTTCAG<br/> TTGTTCCAGTTCTCACGCTTGGCTCTTATCAAAGCGATGGATAGTCCCGGTT<br/> GGCGACTTGTTGGTTTGTGATAAATGATCCAAGTGACTTCTTCAAAAACCC<br/> AAGGTTTGCTTTGTGTACTTTCTCTTCTGGTAA </p>                                                                                                                                                                                                                                                                                                                                                                                                                                                                                                                                                                                                                                                                                                                                                                                                                                                                                                                                                                                                                                                                                                                                                                                                                                                                                                                                                                                                                                                                                                                                                                                                                                                                                                                                                                                                                                                                                                                                                                                                                      |
| Unigene63900_All | <i>CsAAAT1-9</i> | <p> TGACATCTTCAGAAACCCAAAGATTGTTGAGCGGCTTAAGAAGTATTTGATA<br/> TTCTTGGGGTTCCTTCGACATTATACAGGCAGCAGTCCCGCGCATTCTCAG<br/> CAAACCTGAAGACGTATTCTTTACAAAGACCATTAATACTAAAGCAGACCTC </p>                                                                                                                                                                                                                                                                                                                                                                                                                                                                                                                                                                                                                                                                                                                                                                                                                                                                                                                                                                                                                                                                                                                                                                                                                                                                                                                                                                                                                                                                                                                                                                                                                                                                                                                                                                                                                                                                                                                                                                                                                                                                                                                                                                                                                                                                                                                                                                                                                                  |

|                     |                  |                                                                                                                                                                                                                                                                                                                                                                                                                                                                                                                                                                                                                                                                                                                                                                                                                                                                                                                                                                                                                                                                                                                                                                                                                                                                                                                                                                                                                                                                                                                                                                                                                                                                                                                                                                                                                                                                                                                                                                                                                                                                                                                                                                                                                                                                                                                                                                                                                                                                                                                                                                                                                                                                                                                                                                                                                                                                                                                                                                                                                                                                                                                                                                                                    |
|---------------------|------------------|----------------------------------------------------------------------------------------------------------------------------------------------------------------------------------------------------------------------------------------------------------------------------------------------------------------------------------------------------------------------------------------------------------------------------------------------------------------------------------------------------------------------------------------------------------------------------------------------------------------------------------------------------------------------------------------------------------------------------------------------------------------------------------------------------------------------------------------------------------------------------------------------------------------------------------------------------------------------------------------------------------------------------------------------------------------------------------------------------------------------------------------------------------------------------------------------------------------------------------------------------------------------------------------------------------------------------------------------------------------------------------------------------------------------------------------------------------------------------------------------------------------------------------------------------------------------------------------------------------------------------------------------------------------------------------------------------------------------------------------------------------------------------------------------------------------------------------------------------------------------------------------------------------------------------------------------------------------------------------------------------------------------------------------------------------------------------------------------------------------------------------------------------------------------------------------------------------------------------------------------------------------------------------------------------------------------------------------------------------------------------------------------------------------------------------------------------------------------------------------------------------------------------------------------------------------------------------------------------------------------------------------------------------------------------------------------------------------------------------------------------------------------------------------------------------------------------------------------------------------------------------------------------------------------------------------------------------------------------------------------------------------------------------------------------------------------------------------------------------------------------------------------------------------------------------------------------|
| CL11783.Contig7_All | <i>CsAAAT2-1</i> | <p>             TGATATTGTTGTGAAAGAATAAAGGAGATTTCCTTGCAATTCATGCCCATATAA<br/>             ACCAGTGGGATCCATGGCTGTTATGATGAACTGAATGTTTCCTCCTCAAAG<br/>             ACATTAGCGATCACATTGACTTAAGCTTCATTCTGGCCAAGGAGGAATCTGTG<br/>             ATCATTCTTCCAGGACTTGCTGTGCCTATGATTGATTGGATTGCGATCACTAAC<br/>             GCGGTTGAACCATCTCACTTGAAGAAGGTTTCGGGAGGGTGAAGTCTTCTA<br/>             TCACCGACACTCCAATCAGCAAATAGAATACTAA<br/>             ATGGAGAACGGATCATCGACGGCGGTGAGATGGGGTTTCCAAGGGAACAAA<br/>             GGGCTGAGCACGGCGTCGGCGATCACCATTAGAGGAATTCTGAACGAGGTTA<br/>             CGGAAAACATCGACAAAGCAGACCCTAGGCCCATCATTCCTCTCGGCCACGG<br/>             CGACCCCTCTGCTTTTCCCTGCTTTCGGACCACTCCTTCGCCGAGGACGCCA<br/>             TCGCCGACGCGTCCGATCCGCCAAATTCAACGGTTATTCTCTACCGTCGGTA<br/>             TTCTCCGGCTCGAAGGGCCATAGCAGAGTACCTCTCAAAAGATCTTCCATAC<br/>             AAGTTGTCACCAGACGATGTTTATTTGACAATTGGATGTACACAAGCAATTGA<br/>             AGTTATGTTAACAGTCTTGCTCGTCCAATAGCTTACATTCTGCTGGCAAGACC<br/>             AGGCTTGGCACTCTATGAACCGCGTGCTGCTTATAGCCATCTTGAAGTCCGCC<br/>             ACTATGATCTTCTACAGAGAAAGGTTGGGAGGTAGATCTTGATGCAGTTGAA<br/>             GCTCTAGCAGATGAAAATACTGTCGCTATGGCTATTATTAATCCTGGCAATCCT<br/>             TGTGGGAATGTCTTTACATACCAACATTTAAAGCAGGTTGCTAAGACTGCAAG<br/>             AAAGCTTGGAATATTAGTGATTGCTGATGAAGTTTATGATCATCTTACTTTTGG<br/>             GAGTAACCCATTCGTGCCCATGGGAGTCTTTGGATCAATTGCACCTGTTATTAC<br/>             AGTTGGGTCTATATCCAAGAGGTGGATTGTTCCAGGTTGGCGACTTGGTTGGC<br/>             TTGTCACAAATGATCCCAATGGCATCCTTGCAAAATATGGGATAGTTGACTGCA<br/>             TTAAGGGCTTTCTAAATATTTCCGCTGACCCGGCAACTTTCATTAGGGGGCA<br/>             ATTCTCAAAATCCTTGAGAAAACGAAAGATGATTCTTTTCAAAATTGTAAAT<br/>             GTACTGAGAGAAGCTGCAGACATTGCTATTATGGAATTAAGAGATCCCTTG<br/>             CATTTCTTGCCCAAGCAAACCTGAAGGATCTATGTTTGAATGGTGAACTAA<br/>             ATCTGTCACTCCTGGAAGACATTAAGATGATATTGACTTCTCTTTCAAGCTGG<br/>             CAAAGGAGGAGTCTGTGATTGTTCTACCAGGGGTGGCTGTAGGACTAAAGAA<br/>             TTGGCTCCGCATAACATTTGCCATTGAGCCATCATCTCTTGAAGAAGGCCTGG<br/>             GGAGAATAAAAGCTTTCTACCAAAGGCATGCTAAGAAGCAATAA<br/>             ATGGGGCTAAATAGCTCCCAAGAACTGCTTCCGCTGGGCTCAATCCACCGCC<br/>             TATGGTTCTAGCCGAGCTGGCTTCTTCGGCGCCGACCAGCCGACCCTGGAGA<br/>             GACACCCATGCAAGCTGTCTCGCTGCTCTCACGGGCGGATTGCGCCTTGTA<br/>             ATGGCTCGAGAGCCGGCGGGGAGGGAGAGACTGAAGGCGAGAATGGCGT<br/>             CAGAGTGACGATAGATGGCGCCGAAAAGCAGCCCCGAAGCCGCTCTCCGGC<br/>             TCTTCTCATCCATGGACACACACAGAGAGAGAGAGAGAAGATGGAG<br/>             AACGGATCATCGACGGCGGTGAGATGGGGTTTCCAAGGGAACAAAGGCTG<br/>             AGCACGGCGTCGGCGATCACCATTAGAGGAATTCTGAACGAGGTTACGGAAA<br/>             ACATCGACAAAGCAGACCCTAGGCCCATCATTCCTCTCGGCCACGGCGACCC<br/>             CTCTGCTTTTCCCTGCTTTCGGACCACTCCTTTCGCCGAGGACGCCATCGCCG<br/>             ACGCCGTCGGATCCGCCAAATTCAACGGTTATTCTCTACCGTCGGTATTCTTC<br/>             CGGCTCGAAGGGCCATAGCAGAGTACCTCTCAAAAGATCTTCCATACAAGTTG<br/>             TCACCAGACGATGTTTATTGACAATTGGATGTACACAAGCAATTGAAGTTATG<br/>             TTAACAGTTCTTGCTCGTCCAAATGCAAACATTCTGCTCCCAAGACCAGGCTT           </p> |
| CL11783.Contig1_All | <i>CsAAAT2-2</i> | <p>             AACGGATCATCGACGGCGGTGAGATGGGGTTTCCAAGGGAACAAAGGCTG<br/>             AGCACGGCGTCGGCGATCACCATTAGAGGAATTCTGAACGAGGTTACGGAAA<br/>             ACATCGACAAAGCAGACCCTAGGCCCATCATTCCTCTCGGCCACGGCGACCC<br/>             CTCTGCTTTTCCCTGCTTTCGGACCACTCCTTTCGCCGAGGACGCCATCGCCG<br/>             ACGCCGTCGGATCCGCCAAATTCAACGGTTATTCTCTACCGTCGGTATTCTTC<br/>             CGGCTCGAAGGGCCATAGCAGAGTACCTCTCAAAAGATCTTCCATACAAGTTG<br/>             TCACCAGACGATGTTTATTGACAATTGGATGTACACAAGCAATTGAAGTTATG<br/>             TTAACAGTTCTTGCTCGTCCAAATGCAAACATTCTGCTCCCAAGACCAGGCTT           </p>                                                                                                                                                                                                                                                                                                                                                                                                                                                                                                                                                                                                                                                                                                                                                                                                                                                                                                                                                                                                                                                                                                                                                                                                                                                                                                                                                                                                                                                                                                                                                                                                                                                                                                                                                                                                                                                                                                                                                                                                                                                                                                                                                                                                                                                                                                                                                                                                                                                                                                                                                                                                   |

|                      |                  |                                                                                                                                                                                                                                                                                                                                                                                                                                                                                                                                                                                                                                                                                                                                                                                                                                                                                                                                                                                                                                                                                                                                                                                                                                                                                                                                                                                                                                                                                                                                                                                                                                                                                                                                                                                                                                                                                                                                                                                                                                                                                                                                                                                                                                                                                                                                                                                                                                                                                                                                                                                                                                                                                                                                                                                                                                                                                   |
|----------------------|------------------|-----------------------------------------------------------------------------------------------------------------------------------------------------------------------------------------------------------------------------------------------------------------------------------------------------------------------------------------------------------------------------------------------------------------------------------------------------------------------------------------------------------------------------------------------------------------------------------------------------------------------------------------------------------------------------------------------------------------------------------------------------------------------------------------------------------------------------------------------------------------------------------------------------------------------------------------------------------------------------------------------------------------------------------------------------------------------------------------------------------------------------------------------------------------------------------------------------------------------------------------------------------------------------------------------------------------------------------------------------------------------------------------------------------------------------------------------------------------------------------------------------------------------------------------------------------------------------------------------------------------------------------------------------------------------------------------------------------------------------------------------------------------------------------------------------------------------------------------------------------------------------------------------------------------------------------------------------------------------------------------------------------------------------------------------------------------------------------------------------------------------------------------------------------------------------------------------------------------------------------------------------------------------------------------------------------------------------------------------------------------------------------------------------------------------------------------------------------------------------------------------------------------------------------------------------------------------------------------------------------------------------------------------------------------------------------------------------------------------------------------------------------------------------------------------------------------------------------------------------------------------------------|
| CL11783.Contig12_All | <i>CsAAAT2-3</i> | <p>             CCCACTCTATGAAGCCCGTGCATTAGCCATCTTGAAGTCGCCACTATGA<br/>             TCTTCTCCAGAGAAAGGTTGGGAGGTAGATCTTGATGCAGTTGAAGCTCTAG<br/>             CAGATGAAAATACTGTCGCTATGGCTATTATTAATCCTGGCAATCCTTGTGGGA<br/>             ATGTCTTTACATACCAACATTTAAAGCAGGTTGCTAAGACTGCAAGAAAGCTT<br/>             GGAATATTAGTGATTGCTGATGAAGTTTATGATCATCTTACTTTTGGGAGTAAC<br/>             CCATTCTGCCCCATGGGAGTCTTTGGATCAATTGCACCTGTTATTACAGTTGGG<br/>             TCTATATCCAAGAGGTGGATTGTTCCAGGTTGGCGACTTGGTTGGCTTGTAC<br/>             AAATGATCCCAATGGCATCCTTGCAAAATATGGGATAGTTGACTGCATTAAGG<br/>             GCTTTCTAAATATTTCCGCTGACCCGGCAACTTTCATTACAGGGGCAATTCCTC<br/>             AAATCCTTGAGAAAACGAAAGATGATTTCTTTTCCAAAATGTTAATGTACTG<br/>             AGAGAAGCTGCAGACATTTGCTATTATGGAATTAAGAGATCCCTTGCAATTCT<br/>             TGCCCAAGCAAACCTGAAGGATCTATGTTTGAATGGTGAAACTAAATCTGTC<br/>             ACTCCTGGAAGACATTAAAGATGATATTGACTTCTCTTTCAAGCTGGCAAAGG<br/>             AGGAGTCTGTGATTGTTCTACCAGGGTGGCTGTAGGACTAAAGAATTGGCTC<br/>             CGCATAACATTTGCCATTGAGCCATCATCTCTTGAAGAAGGCCTGGGGAGAAT<br/>             AAAAGCTTTCTACCAAAGGCATGCTAAGAAGCAATA<br/>             CAAGGGAACAAAGGGCTGAGCACGGCGTCGGCGATCACCATTAGAGGAATTC<br/>             TGAACGAGGTTACGGAACATCGACAAAGCAGACCCTAGGCCCATCATTCC<br/>             TCTCGGCCACGGCGACCCCTCTGCTTTTCCCTGCTTTTCGGACCACTCCTTCG<br/>             CCGAGGACGCCATCGCCGACGCGTCCGATCCGCCAAATTCAACGGTTATTCT<br/>             CCTACCGTCGGTATTCTTCCGGCTCGAAGGGCCATAGCAGAGTACCTCTCAA<br/>             AGATCTTCCATACAAGTTGTCACCAGACGATGTTTATTGACAATTGGATGTAC<br/>             ACAAGCAATTGAAGTTATGTTAACAGTTCTTGCTCGTCCAAATGCAACAATTC<br/>             TGCTCCCAAGACCAAGGCATGGCACTCTATGAACCGCGTCTGCTTATAGCCAT<br/>             CTGAAGTCCGCCACTATGATCTTCTACAGAGAAAGGTTGGGAGGTAGATCT<br/>             TGATGCAGTTGAAGCTCTAGCAGATGAAAATACTGTCGCTATGGCTATTATTAA<br/>             TCCTGGCAATCCTGTGGGAATGCTTTACATACCAACATTTAAAGCAGGTTGC<br/>             TAAGACTGCAAGAAAGCTTGAATATTAGTGATTGCTGATGAAGTTTATGATCA<br/>             TCTTACTTTTGGGAGTAACCCATTCGTGCCCATGGGAGTCTTTGGATCAATTGC<br/>             ACCTGTTATTACAGTTGGGTCTATATCCAAGAGGTGGATTGTTCAGGTTGGCG<br/>             ACTTGGTTGGCTTGTCAAAATGATCCCAATGGCATCCTTGCAAAATATGGGAT<br/>             AGTTGACTGCATTAAGGGCTTTCTAAATATTTCCGCTGACCCGGCAACTTTCAT<br/>             TCAGGGGGCAATTCCCTCAAATCCTTGAGAAAACGAAAGATGATTCTTTTCCA<br/>             AAATTGTTAATGTACTGAGAGAAGCTGCAGACATTTGCTATTATGGAATTAAG<br/>             AGATCCCTTGCAATTCTTGCCCAAGCAAACCTGAAGGATCTATGTTTGAATGG<br/>             TGAAACTAAATCTGTCACTCCTGGAAGACATTAAAGATGATATTGACTTCTCTT<br/>             TCAAGCTGGCAAAGGAGGAGTCTGTGATTGTTCTACCAGGGTGGCTGTAGG<br/>             ACTAAAGAATTGGCTCCGCATAACATTGCCATTGAGCCATCATCTCTGAAG<br/>             AAGGCCTGGGGAGAATAAAAGCTTTCTACCAAAGGCATGCTAAGAAGCAATA<br/>             A           </p> |
| CL11783.Contig2_All  | <i>CsAAAT2-4</i> | <p>             ATGGAGAACGGATCATCGACGGCGGTGAGATGGGGTTTCCAAGGGAACAAA<br/>             GGGCTGAGCACGGCGTCGGCGATCACCATTAGAGGAATTCTGAACGAGGTTA<br/>             CGGAAAACATCGACAAAGCAGACCCTAGGCCCATCATTCTCTCGGCCACGG<br/>             CGACCCCTCTGCTTTTCCCTGCTTTTCGGACCACTCCTTTCGCCGAGGACGCCA           </p>                                                                                                                                                                                                                                                                                                                                                                                                                                                                                                                                                                                                                                                                                                                                                                                                                                                                                                                                                                                                                                                                                                                                                                                                                                                                                                                                                                                                                                                                                                                                                                                                                                                                                                                                                                                                                                                                                                                                                                                                                                                                                                                                                                                                                                                                                                                                                                                                                                                                                                                                                                             |

CL11783.Contig5\_All      *CsAAAT2-5*CL11783.Contig8 All *CsAAAT2-6*

CL11783.Contig6\_All

*CsAAAT2-7*

AACATCGACAAAGCAGACCCTAGGCCCATCATTCTCTCGGCCACGGCGACC  
CCTCTGCTTTTCCCTGCTTTCGGACCACTCCTTTCGCCGAGGACGCCATCGCC  
GACGCCGTCCGATCCGCCAAATTCAACGGTTATTCTCTACCGTCGGTATTCTT  
CCGGCTCGAAGGGCCATAGCAGAGTACCTCTCAAAGATCTTCCATACAAGTT  
GTCACCAGACGATGTTTATTGACAATTGGATGTACACAAGCAATTGAAGTTAT  
GTTAACAGTTCTTGCTCGTCCAAATGCAAACATTCTGCTCCCAAGACCAGGCT  
TCCCACTCTATGAAGCCCGTGTGCAATTTAGCCATCTTGAAGTCGCCACTATG  
ATCTTCTTCCAGAGAAAGGTTGGGAGGTAGATCTTGATGCAGTTGAAGCTCTA  
GCAGATGAAAATACTGTCGCTATGGCTATTATTAATCCTGGCAATCCTTGTGGG  
AATGTCTTTACATACCAACATTTAAAGCAGGTTGCTAAGACTGCAAGAAAGCT  
TGGAATATTAGTGATTGCTGATGAAGTTTATGATCATCTTACTTTGGGAGTAA  
CCCATTTCGTGCCCATGGGAGTCTTTGGATCAATTGCACCTGTTATTACAGTTGG  
GTCTATATCCAAGAGGTGGATTGTTCCAGGTTGGCGACTTGGTTGGCTTGTCA  
CAAATGATCCCAATGGCATCCTTGCAAAATATGGGATAGTTGACTGCATTAAGG  
GCTTTCTAAATATTTCCGCTGACCCGGCAACTTTCATTACAGTTTGTGTTCAA  
AATGCTTTTCTGA  
ACAAACCTTCTCTCTCTCTCTTTCTCTTTCTCTTTCTCTCTCTCATACAC  
ACACACACACGCGCACACACAGAGAGAGAGAGAGAGAAGATGGAGAAC  
GGATCATCGACGGCGGTGAGATGGGGTTTCCAAGGGAACAAAGGGCTGAGC  
ACGGCGTCGGCGATCACCATTAGAGGAATTCTGAACGAGGTTACGGAAAACA  
TCGACAAAGCAGACCCTAGGCCCATCATTCTCTCGGCCACGGCGACCCCTCT  
GCTTTTCCCTGCTTTCGGACCACTCCTTTCGCCGAGGACGCCATCGCCGACGC  
CGTCCGATCCGCCAAATTCAACGGTTATTCTCTACCGTCGGTATTCTTCCGGC  
TCGAAGGGCCATAGCAGAGTACCTCTCAAAGATCTTCCATACAAGTTGTCAC  
CAGACGATGTTTATTGACAATTGGATGTACACAAGCAATTGAAGTTATGTTAA  
CAGTTCTTGCTCGTCCAAATGCAAACATTCTGCTCCCAAGACCAGGCTTCCCA  
CTCTATGAAGCCCGTGTGCAATTTAGCCATCTTGAAGTCGCCACTATGATCTT  
CTTCCAGAGAAAGGTTGGGAGGTAGATCTTGATGCAGTTGAAGCTCTAGCAG  
ATGAAAATACTGTCGCTATGGCTATTATTAATCCTGGCAATCCTTGTGGGAATG  
TCTTTACATACCAACATTTAAAGCAGGTTGCTAAGACTGCAAGAAAGCTTGGG  
ATATTAGTGATTGCTGATGAAGTTTATGATCATCTTACTTTTGGGAGTAACCCAT  
TCGTGCCCATGGGAGTCTTTGGATCAATTGCACCTGTTATTACAGTTGGGTCTA  
TATCCAAGAGGTGGATTGTTCCAGGTTGGCGACTTGGTTGGCTTGTCAAAAT  
GATCCCAATGGCATCCTTGCAAAATATGGGGTTCTCTCTCTCTATCTCCCTC  
TCTTCTCTCCCTCCCTCCCTTGCATGTTTCTCATGCCATAGTAGTGTCCCTC  
TATTTAGTCCAACAAGTATAGAACAATTAAGTCAATGTGA

The sequence highlighted in green represented the forward primer sequences(5'-3'); the sequence highlighted in yellow sequence represented reverse primer sequences(3'-5'). Underline indicated amplicon sequences(5'-3') of qRT-PCR assay.
