# Supplementary material for: The Dynamic Change in Aromatic Compounds and Their Relationship with CsAAAT Genes during the Post-Harvest Process of Oolong Tea
Source: MDPI journal article supplement (doi:10.3390/metabo13070868), 2023-07-20
Supplement: s1 [file s1]

**Table S1 The specific primers for qRT-PCR**

| Gene symbol      | Forward primer sequence (5'–3') | Reverse primer sequence (5'–3') | Melting temperature(°C) | Amplicon length (bp) |
|------------------|---------------------------------|---------------------------------|-------------------------|----------------------|
| <i>CsAAAT1-1</i> | GCAGACCATACCATACCAGAG           | ATGTTTCGTCGGCGTTTC              | 57.2/58.1               | 119                  |
| <i>CsAAAT1-3</i> | CACAATCAAAGGCATTCTGG            | TTCTTCAGCAACAACAGTGG            | 59.1/57.4               | 130                  |
| <i>CsAAAT1-9</i> | CCTCCTCAAAGACATTAGCG            | AAAGACTTCACCCTCCCGA             | 57.6/59.6               | 168                  |
| <i>CsAAAT2-1</i> | AACAGTTCTTGCTCGTCCA             | ACCTCCCAACCTTTCTCTG             | 56.9/56.7               | 132                  |
| <i>CsAAAT2-3</i> | TTCTGCTCCCAAGACCA               | ACCTCCCAACCTTTCTCTG             | 56.0/56.7               | 103                  |
| <i>CsAAAT2-6</i> | TCTCATACACACACACACG             | AGCCCTTTGTTCCCTTG               | 56.4/56.1               | 107                  |
| <i>CsGAPDH</i>   | TTGTCATCGTTGAGGGTCT             | CAGTGGAACGCGGAAAGC              | 61.6/61.7               | 206                  |
