# Supplementary material for: The Dynamic Change in Aromatic Compounds and Their Relationship with CsAAAT Genes during the Post-Harvest Process of Oolong Tea
Source: MDPI journal article supplement (doi:10.3390/metabo13070868), 2023-07-20
Supplement: s1 [file s1]

**Table S2 The The concentration and A260/A280 ratios of total RNA of samples**

| Sample                | F     | SW    | T3    | CK3   |
|-----------------------|-------|-------|-------|-------|
| Concentration (ng/μl) | 675.5 | 630.2 | 750.3 | 798.3 |
| A260/A280             | 2.09  | 2.08  | 2.07  | 2.07  |

F: fresh tea leaves; SW: solar-withered leaves; T3: turn-over treatment for three times; CK3: control group without turn-over treatment for three times.
