# Supplementary material for: The Dynamic Change in Aromatic Compounds and Their Relationship with CsAAAT Genes during the Post-Harvest Process of Oolong Tea
Source: MDPI journal article supplement (doi:10.3390/metabo13070868), 2023-07-20
Supplement: s1 [file s1]

**Table S4 Sensory evaluation results of raw oolong tea**

|    | Appearance            | Liquor colour |      |      | Aroma                                              | Taste                                          |  |  | Infused leaf                           |  |  |
|----|-----------------------|---------------|------|------|----------------------------------------------------|------------------------------------------------|--|--|----------------------------------------|--|--|
| Rt | Wiry, yellow bloom    | Golden yellow |      |      | Fragment and lasting, with flowery aroma           | Mellow, fresh and brisk                        |  |  | Yellowish green and even with red even |  |  |
| Rc | Wiry, greenish yellow | Yellow        | with | deep | Clean and refreshing , less gentle flowery flavour | Heavy rather mellow with green and astringency |  |  | Yellowish green and even               |  |  |

Rt: raw oolong tea from T3 in experimental group; Rc: raw oolong tea from CK3 in control group; OVA: odor activity value
