# Supplementary material for: The Dynamic Change in Aromatic Compounds and Their Relationship with CsAAAT Genes during the Post-Harvest Process of Oolong Tea
Source: MDPI journal article supplement (doi:10.3390/metabo13070868), 2023-07-20
Supplement: s1 [file s1]

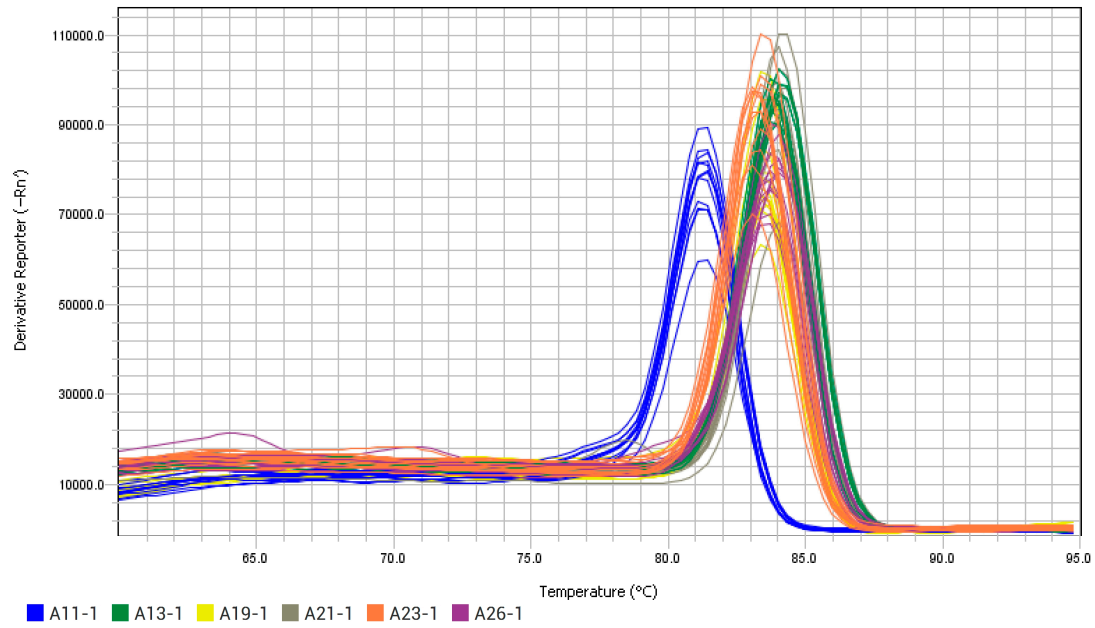

**Figure S1 The melting curve plot of key *CsAAAT* genes during the post-harvest process of oolong tea**

The specific melting curve pattern was used to validate the FPKM of key *CsAAAT* genes. The X-axis showed the The X-axis represented the process of heating up(range from 60°C to 95 °C). The y-axis showed the derivative reporter(-Rn). A11-1, A13-1, A19-1, A21-1, A23-1, and A26-1 represented *CsAAAT1-1*, *CsAAAT1-3*, *CsAAAT1-9*, *CsAAAT2-1*, *CsAAAT2-3*, *CsAAAT2-6* gene, respectively.
